# Supplementary material
Source: publisher figshare collection journal article supplement (https://acs.figshare.com/ndownloader/files/4515286)
Supplement: Supplementary file 1 [file 4515286]

## **Supporting Information for**

### **Tuning electronic properties of hydro-boron-carbon compounds by hydrogen and boron contents: a first principles study**

Yi Ding, and Jun Ni\*

Department of Physics and Key Laboratory of Atomic and Molecular Nanoscience (Ministry of Education), Tsinghua University, Beijing 100084, People's Republic of China

Figure S1:

the convergence with respect to the k-point sampling for  $\text{BC}_3$  sheet.

Figure S2:

the convergence with respect to the plane-wave cutoff energies for  $\text{BC}_3$  sheet.

Figure S3:

the convergence with respect to the k-point sampling for all-H type of hydro- $\text{BC}_3$  compound.

Figure S4:

the convergence with respect to the plane-wave cutoff energies for all-H type of hydro- $\text{BC}_3$  compound.

Figure S5:

The energy bands of  $\text{BC}_3$  sheet and hydro- $\text{BC}_3$  compounds by PAW pseudopotentials.

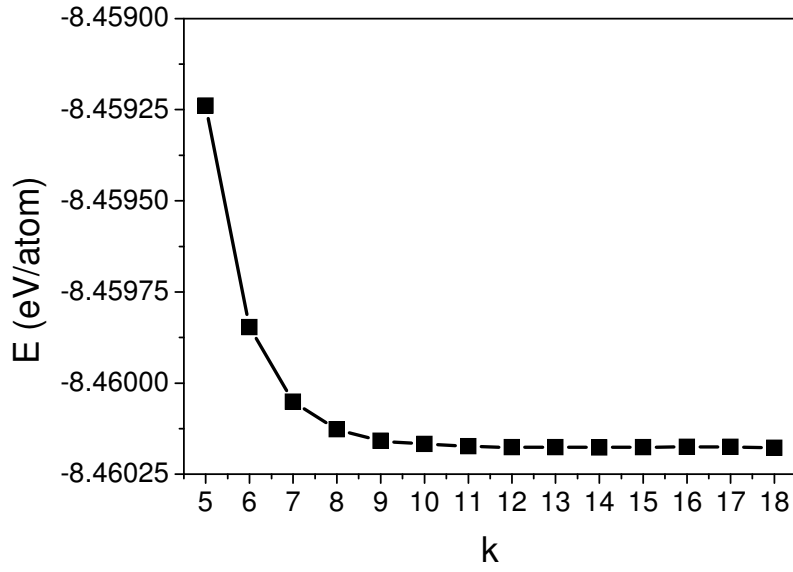

**Figure S1:** The total energies of  $\text{BC}_3$  sheet versus different  $k \times k \times 1$  k-mesh. The plane-wave cutoff energy is fixed as 350 eV.

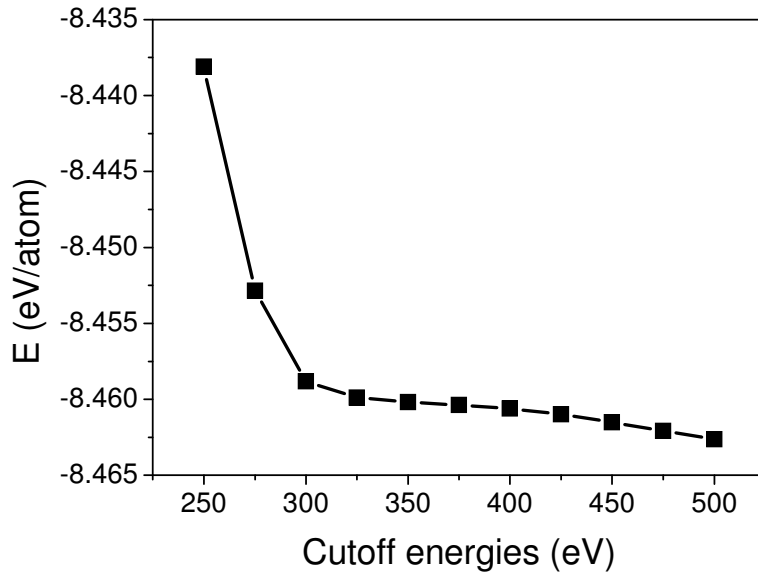

**Figure S2:** The total energies of  $\text{BC}_3$  sheet versus different plane-wave cutoff energies. The k-mesh is fixed as  $15 \times 15 \times 1$ .

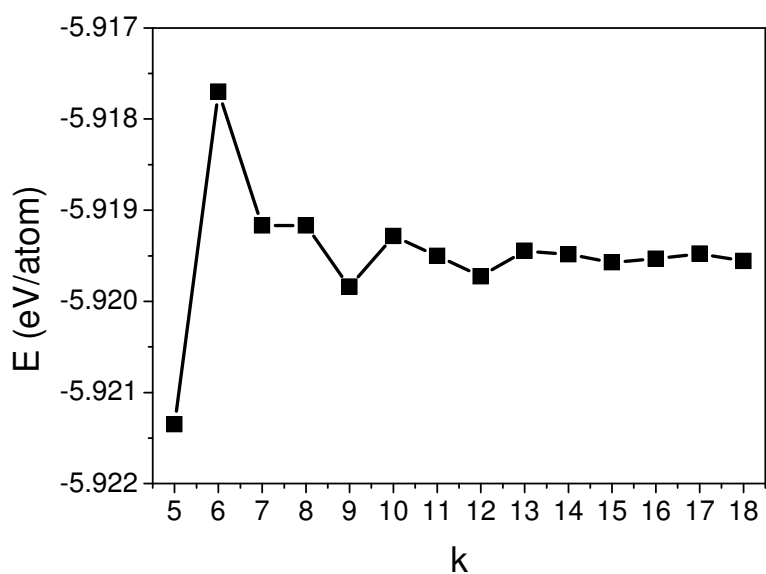

**Figure S3:** The total energies for all-H type of hydro-BC<sub>3</sub> compound versus different  $k \times k \times 1$  k-mesh. The plane-wave cutoff energy is fixed as 350 eV.

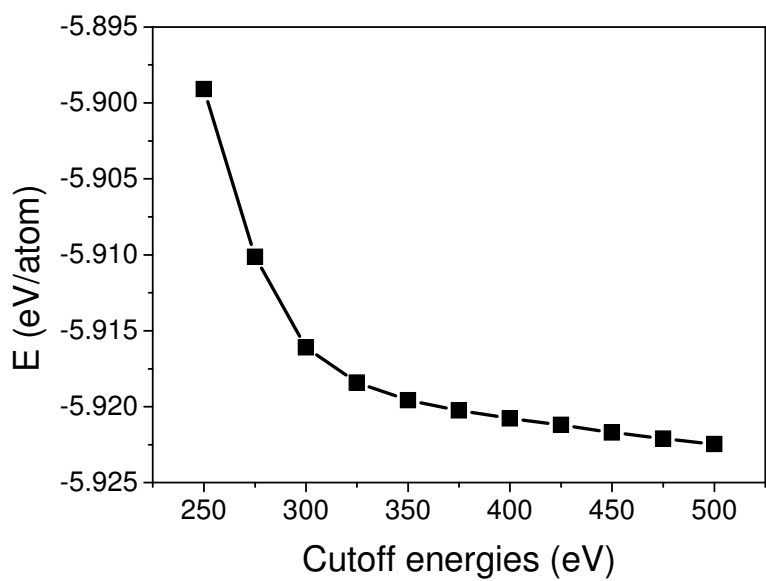

**Figure S4:** The total energies for all-H type of hydro-BC<sub>3</sub> compound versus different plane-wave cutoff energies. The k-mesh is fixed as  $15 \times 15 \times 1$ .

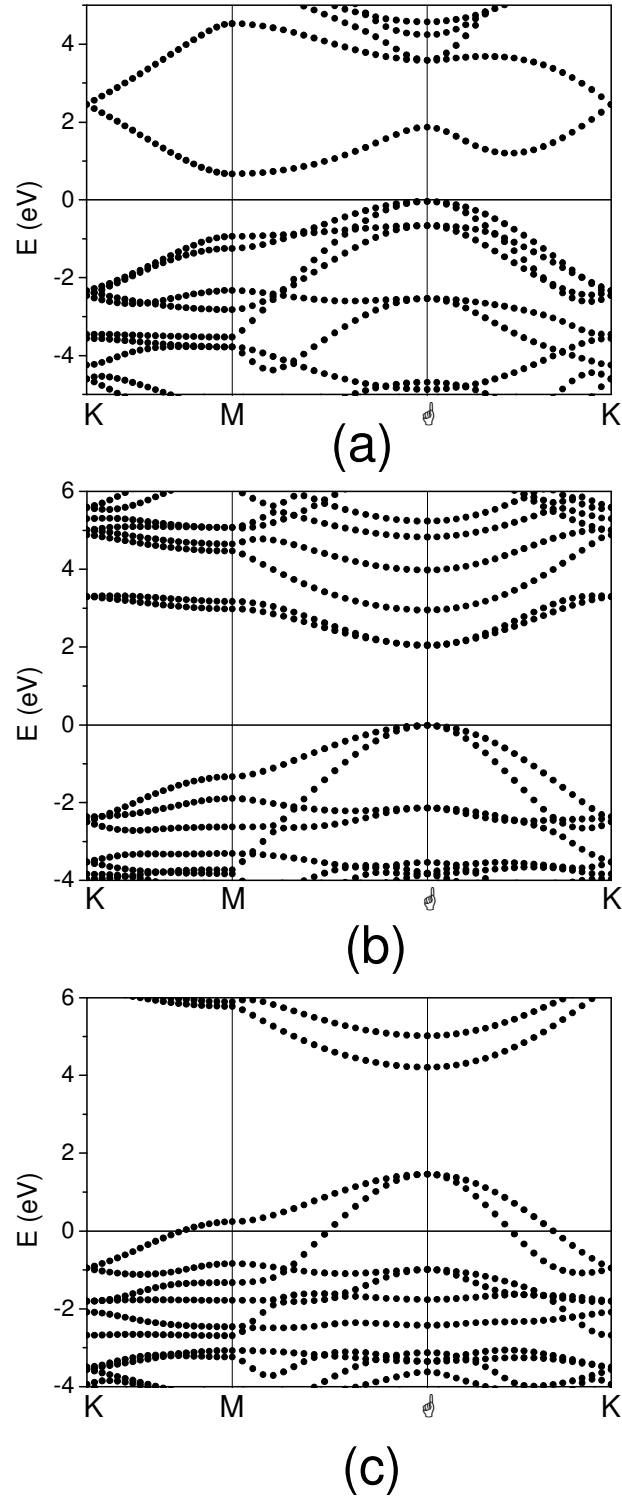

**Figure S5:** The energy bands of (a) the BC<sub>3</sub> sheet, (b) the C-H type and (c) the all-H type of hydro-BC<sub>3</sub> compounds. The Fermi level is indicated as the line at  $E = 0.0$  eV.
